# Supplementary material
Source: publisher site journal article supplement (https://www.dovepress.com/article/458032)
Supplement: Supplementary file 1 [file get_supplementary_file.php]

**Supplementary Material**

**Table S1. Definitions of the different conduction diseases**

| **Conduction Disease Diagnosis** | **Minnesota code** | **Definition** |
| --- | --- | --- |
| **Atrioventricular block (AVB)** |  |  |
| First-degree AVB | 6-3 | P waves associated with 1:1 atrioventricular conduction and a PR interval >200 ms (this is more accurately defined as atrioventricular delay because no P waves are blocked) |
| Second-degree AVB | 6-2 | P waves with a constant rate (<100 bpm) where atrioventricular conduction is present but not 1:1 |
| Mobitz type I: P waves with a constant rate (<100 bpm) with a periodic single non-conducted P wave associated with P waves before and after the non-conducted P wave with inconstant PR intervals |
| Mobitz type II is characterized by fixed PR intervals before and after blocked beats and is usually  associated with a wide QRS complex |
| Third-degree AVB | 6-1 | No evidence of atrioventricular conduction |
| **Right Bundle branch block (RBBB)** |  |  |
| Complete RBBB | 7-2 | 1. QRS duration of 120 ms or longer in the presence of normal sinus rhythm or supraventricular rhythm;  2.R or rSR′complex in lead V1;  3.rS in leads V5, V6, I, or aVL with prolonged shallow S wave. |
| Incomplete RBBB | 7-3 | Same QRS morphology criteria as complete RBBB but with a QRS duration between 110 and 119 ms |
| **Left bundle branch block (LBBB)** |  |  |
| Complete LBBB | 7-1 | 1. QRS duration of 120 ms or longer in the presence of normal sinus rhythm or supraventricular rhythm (not atrial fibrillation);  2. QS or rS complex in lead V1;  3. broad R waves in leads I, aVL, V5-V6 (or an rS pattern in V5-V6);  4. absence of Q waves in leads V5, V6, or I. |
| Incomplete LBBB | 7-6 | 1. QRS duration between 110 and 119 ms in adults；  2. Presence of left ventricular hypertrophy pattern；  3. R peak time >60 ms in leads V4, V5, and V6；  4. Absence of Q wave in leads I, V5, and V6 |
| **Left anterior fascicular block** |  | 1. QRS duration <120 ms；  2. Frontal plane axis between −45° and −90°；  3. R-peak time in lead aVL of ≥45 ms；  4. qR (small r, tall R) pattern in lead aVL；  5.rS pattern (small r, deep S) in leads II, III, and aVF |
| **Left posterior fascicular block** |  | 1. QRS duration <120 ms；  2. Frontal plane axis between 90° and 180°；  3.rS (small r, deep S) pattern in leads I and aVL；  4. qR (small q, tall R) pattern in leads III and aVF |
| **Nonspecific intraventricular conduction delay** | 7-4 | QRS duration >110 ms where morphology criteria for RBBB or LBBB are not present |

**Table S2. Adjusted HRs and 95% CIs for risks of FAVB, HAVB, and LAFB according to UA and hs-CRP**

| **group** | **Cases/total** | **Incidence ratea** | **Model 1** | | **Model 2** | | **Model 3** | |
| --- | --- | --- | --- | --- | --- | --- | --- | --- |
| **HR（95%CI）** | | **HR（95%CI）** | | **HR（95%CI）** | |
| **FAVB** | 903/81,896 | 10.40 |  |  |  | |  |  |
| UA-CRP- | 636/64,715 | 9.27 | Ref. | | Ref. | | Ref. | |
| UA+CRP- | 69/4494 | 14.53 | 1.41 (1.10-1.81) | | 1.31 (1.02-1.69) | | 1.25 (0.97-1.61) | |
| UA-CRP+ | 174/11,558 | 14.19 | 1.51 (1.28-1.79) | | 1.49 (1.25-1.76) | | 1.49 (1.26-1.77) | |
| UA+CRP+ | 24/1129 | 20.71 | 2.11 (1.40-3.17) | | 1.98 (1.32-2.99) | | 1.88 (1.24-2.83) | |
| **HAVB** | 93/81,896 | 1.07 |  |  |  |  |  |  |
| UA-CRP- | 59/64,715 | 0.86 | Ref. | | Ref. | | Ref. | |
| UA+CRP- | 11/4494 | 2.31 | 2.23 (1.17-4.25) | | 1.97 (1.02-3.80) | | 1.80 (0.93-3.48) | |
| UA-CRP+ | 20/11,558 | 1.62 | 1.58 (0.95-2.63) | | 1.54 (0.92-2.57) | | 1.54 (0.92-2.58) | |
| UA+CRP+ | 3/1129 | 2.56 | 2.34 (0.73-7.46) | | 1.96 (0.61-6.31) | | 1.74 (0.54-5.64) | |
| **LAFB** | 578/81,896 | 6.65 |  |  |  |  |  |  |
| UA-CRP- | 422/64,715 | 6.14 | Ref. | | Ref. | | Ref. | |
| UA+CRP- | 34/4494 | 7.15 | 1.05 (0.74-1.48) | | 1.03 (0.72-1.46) | | 1.05 (0.74-1.50) | |
| UA-CRP+ | 115/11,558 | 9.35 | 1.46 (1.18-1.80) | | 1.44 (1.17-1.78) | | 1.44 (1.17-1.78) | |
| UA+CRP+ | 7/1129 | 5.99 | 0.91 (0.43-1.93) | | 0.86 (0.41-1.82) | | 0.89 (0.42-1.89) | |

a Case per 10000 person-years.

Model 1: Adjusted for age and sex;

Model 2: Adjusted for variables in Model 1 plus smoking, drinking, physical activity, BMI, eGFR, LDL-C, HDL-C, TG, hypertension (yes or no) and diabetes (yes or no)；

Model 3: Adjusted for variables in Model 2 plus antihypertensive drug use (yes or no), hypoglycemic drug use (yes or no), and lipid-lowering drug use (yes or no).

Abbreviations: BMI, body mass index; CIs, confidence intervals; eGFR, estimated glomerular filtration rate; FAVB, first-degree atrioventricular block; HAVB, high-grade atrioventricular block; HRs, hazard ratio; hs-CRP, high-sensitivity C-reactive protein; LAFB, left anterior fascicular block; TG, triglycerides; UA, uric acid.

**Table S3. Adjusted HRs and 95% CIs for risks of different events according to UA and hs-CRP using time-dependent Cox proportional hazards model**

| **group** | **Model 1** | **Model 2** | **Model 3** |
| --- | --- | --- | --- |
| **HR（95%CI）** | **HR（95%CI）** | **HR（95%CI）** |
| **Cardiac conduction block** |  |  |  |
| UA-CRP- | Ref. | Ref. | Ref. |
| UA+CRP- | 1.21 (1.14-1.28) | 1.16 (1.09-1.23) | 1.15 (1.08-1.22) |
| UA-CRP+ | 1.12 (1.07-1.18) | 1.10 (1.05-1.15) | 1.10 (1.05-1.15) |
| UA+CRP+ | 1.36 (1.23-1.49) | 1.28 (1.16-1.41) | 1.26 (1.14-1.38) |
| **Atrioventricular block** |  |  |  |
| UA-CRP- | Ref. | Ref. | Ref. |
| UA+CRP- | 1.54 (1.41-1.70) | 1.43 (1.30-1.57) | 1.39 (1.26-1.53) |
| UA-CRP+ | 1.10 (1.01-1.19)  1.67 (1.43-1.95) | 1.05 (0.97-1.14) | 1.04 (0.96 -1.13) |
| UA+CRP+ | 1.49 (1.27-1.74) | 1.42 (1.21-1.66) |
| **Right bundle branch block** |  |  |  |
| UA-CRP- | Ref. | Ref. | Ref. |
| UA+CRP- | 1.15 (1.06-1.26) | 1.12 (1.02-1.22) | 1.11 (1.02-1.21) |
| UA-CRP+ | 1.08 (1.01-1.16) | 1.08 (1.01-1.15) | 1.08 (1.01-1.15) |
| UA+CRP+ | 1.34 (1.17-1.54) | 1.31 (1.14-1.51) | 1.30 (1.12-1.49) |
| **Left bundle branch block** |  |  |  |
| UA-CRP- | Ref. | Ref. | Ref. |
| UA+CRP- | 2.22 (1.64-3.00) | 2.07 (1.52-2.82) | 2.00 (1.47-2.73) |
| UA-CRP+ | 1.32 (0.99-1.77) | 1.27 (0.95-1.70) | 1.26 (0.94-1.69) |
| UA+CRP+ | 2.82 (1.79-4.42) | 2.51 (1.59-3.98) | 2.37 (1.50-3.76) |

Model 1: Adjusted for age and sex;

Model 2: Adjusted for variables in Model 1 plus smoking, drinking, physical activity, BMI, eGFR, LDL-C, HDL-C, TG, hypertension (yes or no) and diabetes (yes or no)；

Model 3: Adjusted for variables in Model 2 plus antihypertensive drug use (yes or no), hypoglycemic drug use (yes or no), and lipid-lowering drug use (yes or no).

Abbreviations: BMI, body mass index; CIs, confidence intervals; eGFR, estimated glomerular filtration rate; HRs, hazard ratio; HDL-C, high-density lipoprotein cholesterol; hs-CRP, high-sensitivity C-reactive protein; LDL-C, low-density lipoprotein cholesterol; TG, triglycerides; UA, uric acid.

**Table S4. Sensitive analyses by UA and hs-CRP**

|  | **Sensitivity analysis-1** | **Sensitivity analysis-2** | **Sensitivity analysis-3** | **Sensitivity analysis-4** | **Sensitivity analysis-5** | **Sensitivity analysis-6** |
| --- | --- | --- | --- | --- | --- | --- |
| **Cardiac conduction block** |  |  |  |  |  |  |
| UA-CRP- | Ref. | Ref. | Ref. | Ref. | Ref. | Ref. |
| UA+CRP- | 1.16 (1.00-1.34) | 1.15 (0.99-1.33) | 1.18 (1.02-1.37) | 1.16 (1.00-1.34) | 1.18 (1.02-1.36) | 1.17 (1.02-1.35) |
| UA-CRP+ | 1.49 (1.36-1.64) | 1.48 (1.35-1.63) | 1.50 (1.36-1.64) | 1.50 (1.36-1.64) | 1.50 (1.37-1.65) | 1.49 (1.36-1.64) |
| UA+CRP+ | 1.61 (1.25-2.06) | 1.59 (1.23-2.04) | 1.65 (1.29-2.12) | 1.65 (1.29-2.11) | 1.67 (1.31-2.14) | 1.64 (1.29-2.10) |
| **Atrioventricular block** |  |  |  |  |  |  |
| UA-CRP- | Ref. | Ref. | Ref. | Ref. | Ref. | Ref. |
| UA+CRP- | 1.30 (1.02-1.65) | 1.33 (1.04-1.69) | 1.38 (1.08-1.77) | 1.35 (1.07-1.71) | 1.35 (1.07-1.71) | 1.34 (1.06-1.70) |
| UA-CRP+ | 1.57 (1.33-1.84) | 1.58 (1.34-1.85) | 1.60 (1.35-1.90) | 1.58 (1.34-1.85) | 1.60 (1.36-1.88) | 1.58 (1.34-1.85) |
| UA+CRP+ | 1.84 (1.23-2.75) | 1.80 (1.19-2.71) | 2.02 (1.35-3.03) | 1.97 (1.34-2.90) | 2.02 (1.37-2.99) | 1.96 (1.33-2.88) |
| **Right bundle branch block** |  |  |  |  |  |  |
| UA-CRP- | Ref. | Ref. | Ref. | Ref. | Ref. | Ref. |
| UA+CRP- | 1.12 (0.90-1.39) | 1.08 (0.87-1.35) | 1.13 (0.92-1.40) | 1.09 (0.88-1.36) | 1.12 (0.91-1.39) | 1.12 (0.91-1.39) |
| UA-CRP+ | 1.40 (1.22-1.61) | 1.38 (1.20-1.58) | 1.38 (1.20-1.58) | 1.39 (1.21-1.60) | 1.39 (1.22-1.60) | 1.39 (1.21-1.59) |
| UA+CRP+ | 1.57 (1.08-2.27) | 1.57 (1.08-2.28) | 1.59 (1.10-2.29) | 1.58 (1.10-2.28) | 1.59 (1.11-2.30) | 1.58 (1.10-2.27) |
| **Left bundle branch block** |  |  |  |  |  |  |
| UA-CRP- | Ref. | Ref. | Ref. | Ref. | Ref. | Ref. |
| UA+CRP- | 2.57 (1.31-5.03) | 2.65 (1.35-5.19) | 2.60 (1.33-5.10) | 2.55 (1.30-4.99) | 2.55 (1.30-4.99) | 2.54 (1.30-4.98) |
| UA-CRP+ | 1.63 (0.93-2.86) | 1.56 (0.88-2.77) | 1.66 (0.94-2.91) | 1.63 (0.93-2.87) | 1.62 (0.92-2.86) | 1.63 (0.93-2.86) |
| UA+CRP+ | 2.66 (0.81-8.66) | 2.80 (0.86-9.14) | 2.70 (0.83-8.81) | 2.66 (0.82-8.68) | 2.67 (0.82-8.71) | 2.67 (0.82-8.69) |

HR was adjusted for age, sex, smoking, drinking, physical activity, BMI, eGFR, LDL-C, HDL-C, TG, hypertension (yes or no), diabetes (yes or no), antihypertensive drugs use (yes or no), hypoglycemic drugs use (yes or no) and lipid-lowering drugs use (yes or no).

Sensitivity analysis-1: Exclude participants eGFR<45 (mL/min/1.73m2) (n=80,184);

Sensitivity analysis-2: Exclude participants with a history of gout (n=81,417);

Sensitivity analysis-3: Exclude participants with follow-up <2 years (n=80,789);

Sensitivity analysis-4: Exclude participants with a history of cancer (n=81,625);

Sensitivity analysis-5: HR was adjusted for age, sex, smoking, drinking, physical activity, BMI, eGFR, LDL-C, HDL-C, TG, hypertension (yes or no), diabetes (yes or no), antihypertensive drugs use (yes or no), hypoglycemic drugs use (yes or no), lipid-lowering drugs use (yes or no), white blood cell count, serum sodium, and serum potassium.

Sensitivity analysis-6: Fine-Gray model.

Abbreviations: BMI, body mass index; CIs, confidence intervals; eGFR, estimated glomerular filtration rate; HRs, hazard ratio; HDL-C, high-density lipoprotein cholesterol; hs-CRP, high-sensitivity C-reactive protein; LDL-C, low-density lipoprotein cholesterol; TG, triglycerides; UA, uric acid.


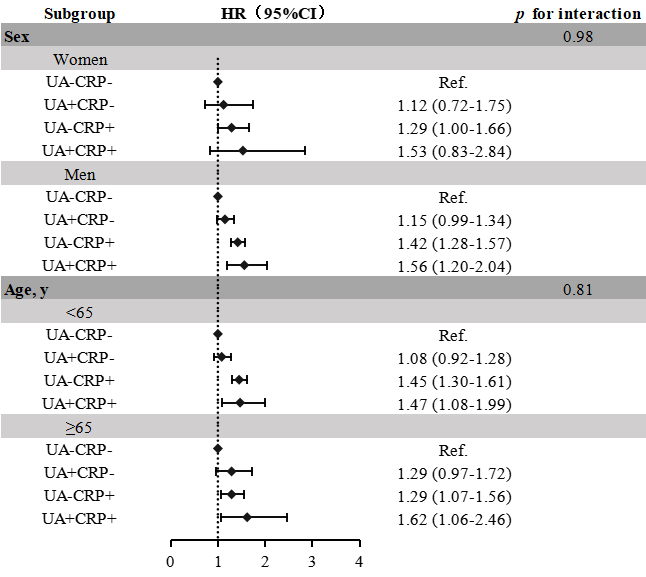


**Figure S1. Subgroup analyses for the association with different groups with risk of cardiac conduction block.**

HR was adjusted for age, sex, smoking, drinking, physical activity, BMI, eGFR, LDL-C, HDL-C, TG, hypertension (yes or no), diabetes (yes or no), antihypertensive drug use (yes or no), hypoglycemic drug use (yes or no), and lipid-lowering drug use (yes or no).

Abbreviation: BMI, body mass index; CIs, confidence intervals; eGFR, estimated glomerular filtration rate; HRs, hazard ratio; HDL-C, high-density lipoprotein cholesterol; hs-CRP, high-sensitivity C-reactive protein; LDL-C, low-density lipoprotein cholesterol; TG, triglycerides; UA, uric acid.
